# Supplementary material for: SARS-CoV-2 Seroepidemiology and Antibody Levels in Children during BA.5 Predominance Period
Source: Preprints.org preprint supplement (doi:10.20944/preprints202402.0288.v1), 2024-02-05
Supplement: Supplementary file 1 [file supplementary]

**Supplementary Table 1**. Multiple linear regression model analysis of 669 SARS-CoV-2 seropositive children for the whole study period (01/05/2022-31/12/2022 and July 2023) involving SARS-CoV-2 natural infection antibody titers as dependent variable and period, sex, age, origin and hospitalization status as independent variables. Statistically significant differences (*P*-value <0.05) are marked in bold.

|  | **Unstandardized**  **Coefficients**  **B** | **Std. Error** | **Standardized**  **Coefficients Beta** | ***P*-value** | **95.0% Confidence Interval for B** | | **Collinearity Statistics** | |
| --- | --- | --- | --- | --- | --- | --- | --- | --- |
|  | **Lower Bound** | **Upper Bound** | **Tolerance** | **VIF** |
| **Total seropositive**  **(n=669, R2=0.011)** | | | | | | | | |
| **Constant** | 35.462 | 15.069 |  | **0.019** | 5.874 | 65.05 |  |  |
| **Period** | -5.873 | 3.659 | -0.063 | 0.109 | -13.058 | 1.312 | 0.955 | 1.047 |
| **Sex** | 3.474 | 4.950 | 0.027 | 0.483 | -6.246 | 13.195 | 0.997 | 1.003 |
| **Age** | 0.008 | 0.042 | 0.008 | 0.842 | -0.074 | 0.091 | 0.921 | 1.086 |
| **Origin** | 15.073 | 5.724 | 0.102 | **0.009** | 3.835 | 26.312 | 0.995 | 1.005 |
| **Hospitalized** | 7.998 | 5.430 | 0.058 | 0.141 | -2.665 | 18.661 | 0.961 | 1.040 |
